# Supplementary material
Source: Elsevier journal article supplement (https://www.sciencedirect.com/science/article/pii/S1885585724002524)
Supplement: mmc1 [file mmc1.pdf]

## **SUPPLEMENTARY DATA**

The authors of this article guarantee that the following researchers are responsible for the data contained in this work.

### **Names of PIs per site:**

- a. *Hospital Clínic, Cardiovascular Clinic Institute, Institut d'Investigacions Biomèdiques August Pi i Sunyer (IDIBAPS), Departament de Medicina, Facultat de Medicina i Ciències de la Salut, Universitat de Barcelona*  
**PI: Manel Sabaté**
  
- b. *Servicio de Cardiología, Hospital Clínico San Carlos, Instituto de Investigación Sanitaria San Carlos (IdISSC), Madrid, Spain*  
**PI: Pilar Jiménez Quevedo**
  
- c. *Servicio de Cardiología, Hospital Universitario Virgen de la Victoria, Málaga, Spain*  
**PI: José María Hernández García**
  
- d. *Servicio de Cardiología, Complejo Hospitalario Universitario de Santiago de Compostela, Santiago de Compostela, A Coruña, Spain*  
**PI: Ramiro Trillo Nouche**
  
- e. *Servicio de Cardiología, Hospital Central de Asturias, Oviedo, Asturias, Spain*  
**PI: Raquel Del Valle**
  
- f. *Servicio de Cardiología, Hospital Universitario Marqués de Valdecilla, IDIVAL, Santander, Cantabria, Spain*  
**PI: José M. de la Torre Hernández**
  
- g. *Servicio de Cardiología, Hospital Ramón y Cajal, Madrid, Spain*  
**PI: Luisa Salido**
  
- h. *Servicio de Cardiología, Hospital Gregorio Marañón, CIBERCV, Universidad Carlos III, Madrid, Spain*  
**PI: Jaime Elizaga**

- i. Servicio de Cardiología, Hospital Universitario Reina Sofía, Universidad de Córdoba, Instituto Maimónides de Investigación Biomédica de Córdoba (IMIBIC), Córdoba, Spain

**PI: José Suárez de Lezo**

- j. Servicio de Cardiología, Hospital Universitario Virgen de las Nieves, Granada, Spain

**PI: Eduardo Molina Lerma**

- k. Servicio de Cardiología, Hospital Universitari Vall d'Hebron, Barcelona, Spain

**PI: Bruno García**

- l. Servicio de Cardiología, Hospital Universitario La Paz, Madrid, Spain

**PI: Raúl Moreno**

- m. Servicio de Cardiología, Hospital General Universitario de Valencia, Valencia, Spain

**PI: Roberto Blanco Mata**

- n. Servicio de Cardiología, Hospital Puerta de Hierro, Majadahonda, Madrid, Spain

**PI: Juan Francisco Oteo Domínguez**

- o. Servicio de Cardiología, Hospital Clínico Universitario de Valladolid, Valladolid, Spain

**PI: Ignacio Amat Santos**

- p. Servicio de Cardiología, Hospital Universitario y Politécnico La Fe, Valencia, Spain

**PI: Francisco Ten Morro**

- q. Servicio de Cardiología, Hospital Universitario de Badajoz, Badajoz, Spain

**PI: Juan Manuel Nogales**

- r. Servicio de Cardiología, Hospital Germans Trias i Pujol, Badalona, Barcelona, Spain

**PI: Julia Ignasi**

- s. Servicio de Cardiología, Hospital Universitario de Basurto, Bilbao, Bizkaia, Spain

**PI: Leire Andraka**

- t. Servicio de Cardiología, Hospital Universitario Miguel Servet, Zaragoza, Spain

**PI: María Cruz Ferrer**

Gabani R, et al. *Impact of gender on in-hospital and long-term outcomes after transcatheter aortic valve implantation: an analysis of the Spanish TAVI registry.* Rev Esp Cardiol. 2024

u. *Servicio de Cardiología, Hospital Clínico Universitario Virgen de la Arrixaca, El Palmar, Murcia, Spain*

**PI: Juan García de Lara**

v. *Servicio de Cardiología, Hospital Universitari de Bellvitge, L'Hospitalet de Llobregat, Barcelona, Spain*

**PI: Rafael Romaguera**

w. *Servicio de Cardiología, Hospital Universitario de León, León, Spain*

**PI: Felipe Fernández**

x. *Servicio de Cardiología, Hospital Universitario de La Princesa, Madrid, Spain*

**PI: Fernando Alfonso**

y. *Servicio de Cardiología, Hospital Clínico Universitario de Valencia, Valencia, Spain*

**PI: Juan Sanchis Forés**

z. *Servicio de Cardiología, Hospital Universitario Fundación Jiménez Díaz, Madrid, Spain*

**PI: Felipe Navarro del Amo**

aa. *Servicio de Cirugía Cardíaca, Hospital Germans Trias i Pujol, Badalona, Barcelona, Spain*

**PI: Xavier Carrillo Suárez**

bb. *Servicio de Cirugía Cardíaca, Hospital Central de Asturias, Oviedo, Asturias, Spain*

**PI: Rocío Díaz Méndez**

cc. *Servicio de Cardiología y Cirugía Cardíaca, Hospital General Universitario de Alicante, Alicante, Spain*

**PI: Juan Meseguer**

dd. *Servicio de Cardiología, Hospital 12 de Octubre, Madrid, Spain*

**PI: Agustín Albarrán González**

ee. *Servicio de Cardiología, Clínica los Manzanos, La Rioja, Spain*

**PI: Ignacio Gallo**

ff. Servicio de Cardiología, Clínica universitario de Navarra, Navarra, Spain

**PI: José Calabuig Nogués**

gg. Servicio de Cardiología, Complejo hospitalario de Navarra, Navarra, Spain

**PI: Valeriano Ruiz Quevedo**

hh. Servicio de Cardiología, Complejo hospitalario Salamanca, Salamanca, Spain

**PI: Ignacio Cruz**

ii. Servicio de Cardiología, COMPLEJO HOSPITALARIO UNIVERSITARIO A CORUÑA, A CORUÑA, Spain

**PI: Jorge Salgado Fernández**

jj. Servicio de Cardiología, COMPLEJO HOSPITALARIO UNIVERSITARIO DE VIGO (MEIXOEIRO), Pontevedra, Spain

**PI: Andrés Íñiguez**

kk. Servicio de Cardiología, Gipuzkoa Polyclinic, San Sebastián, Spain

**PI: Mariano Larman**

ll. Servicio de Cardiología, Hospital Del Mar, Barcelona, Spain

**PI: Beatriz Vaquerizo**

mm. Servicio de Cardiología, Hospital Universitario Clínico San Cecilio, Granada, Spain

**PI: Manuel López Pérez**

nn. Servicio de Cardiología, Hospital Universitario Juan Ramón Jiménez, Huelva, Spain

**PI: José Díaz Fernández**

oo. Servicio de Cardiología, Hospital Regional de Málaga, Málaga, Spain

**PI: Cristóbal Urbano Carrillo**

pp. Servicio de Cardiología, Hospital de St. Pau, Barcelona, Spain

**PI: Luis Asmarats**

qq. *Servicio de Cardiología, Hospital Universitario Infanta Cristina, Madrid, Spain*

**PI: López Miniguez**

rr. *Servicio de Cardiología, Hospital Universitario Puerta del Mar, Cádiz, Spain*

**PI: Miguel Ángel Gómez Vidal**

ss. *Servicio de Cardiología, Hospital Universitario Virgen Macarena, Sevilla, Spain*

**PI: Rafael Ruiz Salmerón**

tt. *Servicio de Cardiología, Hospital Virgen de la Salud Toledo, Toledo, Spain*

**PI: José Moreu Burgos**

uu. *Servicio de Cardiología, Hospital Universitario Virgen del Rucio, Sevilla, Spain*

**PI: José María Cubero Gómez**
